# Supplementary material for: Assembling graphene quantum dots on aminophenol-formaldehyde resin towards efficient artificial photocatalytic hydrogen peroxide synthesis
Source: Royal Society of Chemistry journal article supplement (doi:10.1039/d4ta08165j), 2025-01-01
Supplement: d4ta08165j1.pdf [file d4ta08165j1.pdf]

***Supporting Information for***

***Assembling Graphene Quantum Dots on Aminophenol-formaldehyde***

***Resin towards Efficient Artificial Photocatalytic Hydrogen Peroxide***

***Synthesis***

*Yuanjie Peng<sup>a‡</sup>, Jiahong Lin<sup>a‡</sup>, Jiewei Xiao<sup>a</sup>, Xincheng Xie<sup>b</sup>, Wenjie Yu<sup>b</sup>, Hao Yan<sup>a</sup>, Dongting Yue<sup>a\*</sup>*

a School of Environmental and Chemical Engineering, Shanghai University, NO.99 Shangda Road, Baoshan District, Shanghai 200444, P. R. China.

b National Facility for Protein Science in Shanghai, Shanghai Advanced Research Institute, Chinese Academy of Sciences, No. 99, Haik Road, Zhangjiang Hi-Tech Park, Pudong Shanghai, 201210, P.R. China.

## **Experimental Procedures**

### **Chemicals and Regents**

3-Aminophenol ( $C_7H_9NO_2$ ,  $\geq 99.0$  wt %), citric Acid ( $C_6H_8O_7$ ,  $\geq 99.0$  wt %), formaldehyde ( $CH_2O$ , 37 wt % in water), ammonia ( $NH_3 \cdot H_2O$ , 25-28 wt %  $NH_3$  in  $H_2O$ ), sodium iodate ( $NaIO_3$ ,  $\geq 99.0$  wt %), benzyl alcohol ( $C_7H_8O$ , 99%), cerium(IV) sulfate ( $Ce(SO_4)_2$ ,  $\geq 99.0$  wt %), sulfuric Acid (95-98 wt %), deionized (DI) water with a resistivity of  $18.2 \text{ M}\Omega \cdot \text{cm}^{-1}$  at  $25^\circ \text{C}$  was used in this study. All the aqueous solutions were prepared by using distilled and deionized water.

### **Preparation of APF and APF-GQDs-x**

3-Aminophenol (110.0 mg, 1.0 mmol) was added into DI water (100 ml). After stirring continuously for 5 min, formaldehyde (37 wt % solution, 150  $\mu\text{l}$ , 2.0 mmol) and  $NH_3 \cdot H_2O$  (25~28 wt %, 100  $\mu\text{l}$ , 0.4 mmol) were added and stirred at room temperature for 60 min. Then, a certain amount of quantum dot solution was added, and stirring continued for 5 hours to obtain APF-GQDs-x. The powers were washed thoroughly with DI water and collected by centrifuging, followed by overnight drying at room temperature under a vacuum.

### **Photocatalyst characterizations**

The synthesized samples underwent thorough structural and morphological analysis using various techniques. X-ray powder diffraction (XRD) was employed to examine the structure, utilizing a Rigaku D/max 2500 powder diffractometer with Cu  $K\alpha$  radiation. The morphology was further investigated through transmission electron microscopy (TEM) using a JEM-F200 model and scanning electron microscopy (SEM) with a Gemini G300. Surface elemental composition was determined via X-ray photoelectron spectroscopy (XPS) conducted on a Thermo Scientific K-Alpha<sup>+</sup> system, employing specific instrument conditions including Al K Alpha as the source gun type, ion energy of 1486.6 eV, and a beam spot of 400  $\mu\text{m}$ , among others. Peak fitting was accomplished using mixed Gaussian/Lorentzian peak shapes after subtraction of Shirley's background. Furthermore, electron paramagnetic resonance (EPR) spectra

obtained from a Bruker Emxplus instrument were utilized to investigate reactive radicals generated during the activation of  $\text{H}_2\text{O}_2$ . These radicals were captured by the spin-trapping agent 5,5-dimethylpyrroline-oxide (DMPO), with a center field at 3350 G, providing valuable insights into the activation process. The absorption spectra for the polymers were recorded on a Shimadzu UV-3600i Plus as powders. Detailed band structures were analyzed by using ultraviolet photoelectron spectroscopy (UPS) with a PHI5000 Versaprobe III (Scanning ESCA Microprobe) SCA (Spherical Analyzer). Photoluminescence (PL) spectra of the synthesized polymers were characterized by the Horiba FluoroLog-QM spectrofluorometer with a CW diode laser (980 nm). The fluorescence lifetime was recorded on a Horiba Fluorolog-QM steady-state and time-resolved fluorescence spectrometer. Electron paramagnetic resonance (EPR) spectra from a Bruker Emxplus were used to probe the reactive radicals generated during activation of  $\text{H}_2\text{O}_2$ , captured by spin trapping agent 5,5-dimethylpyrroline-oxide (DMPO) and 2,2,6,6-Tetramethylpiperidine-1-oxyl (TEMPO) with a center field at 3350 G.

#### **Photoelectrochemical measurement**

The cyclic voltammetry (CV) was performed on the Zennium electrochemical workstation (Zahner) with a three-electrode system, where an L-type glassy carbon electrode (L-GCE) as the working electrode, a Pt wire as the counter electrode, an Ag/AgCl electrode (3 M KCl) as the reference electrode. The GCE was cleaned before each run by polishing with 0.3 mm and 0.05 mm alumina slurry and then rinsing with ultrapure water. Electrochemical impedance spectra (EIS) were performed on the Zennium electrochemical workstation (Zahner) with a three-electrode system, where a Pt foil and Ag/AgCl electrode were used as the counter and reference electrodes, respectively. A 150W–Xenon lamp (CEL–S500, CEAULIGHT) was used as the light source. The CV and EIS tests were performed under continuous  $\text{O}_2$  bubbling at different temperatures.

The preparation method of the working electrodes is as follows. The catalyst ink was prepared by mixing 3 mg of catalyst, 0.1 mL of DI water, 0.05 mL of 0.5% Nafion, and 1.80 mL of EtOH and ultra-sonicating for at least 30 min. Next, 10  $\mu\text{L}$  of the ink was

dropped on the polished L-GCE. Finally, the as-prepared catalyst film was dried at room temperature.

### Photocatalytic H<sub>2</sub>O<sub>2</sub> production

Briefly, 5.0 mg catalyst and 50.0 mL H<sub>2</sub>O were added to the 300.0 mL reactor with continuous O<sub>2</sub> bubbling. The bottle was photoirradiated by AM1.5G simulated sunlight irradiation using a 150W–Xenon lamp (CEL–S500, CEAULIGHT), and the reactions were performed at room temperature. After the reactions, the solution was filtered through a 0.45-μm polytetrafluoroethylene (PTFE) filter to remove the catalyst, and the H<sub>2</sub>O<sub>2</sub> amount was quantified by a traditional cerium sulfate Ce(SO<sub>4</sub>)<sub>2</sub> titration method<sup>1</sup>. For the determination of SCC efficiency, an AM1.5G solar simulator was used with 1.0 g of catalyst and 200.0 ml of water under O<sub>2</sub> bubbling (0.1 min<sup>-1</sup>) at 303K. The SCC efficiency was determined using.

$$\text{SCC efficiency (\%)} = \frac{\Delta G \text{ For } H_2O_2 \text{ generation (J/mol)} \times \text{Formed } H_2O_2 \text{ (mol)}}{\text{Unit input energy (W/cm}^2\text{)} \times \text{The irradiated area (cm}^2\text{)} \times \text{Reaction time (s)}} \times 100\%$$

ΔG–The free energy of H<sub>2</sub>O<sub>2</sub> production is 117 kJ/mol.

Unit input power (W/cm<sup>2</sup>) –The radiation intensity of the light source is 0.1W/cm<sup>2</sup> with an AM1.5 global filter for 300 ~ 2500 nm.

The irradiated area (cm<sup>2</sup>) –1.0×1.0 cm<sup>2</sup>.

Reaction time–3600 s.

The amount of H<sub>2</sub>O<sub>2</sub> generation is 35.1 μmol.

$$\text{SCC efficiency (\%)} = \frac{117000 \text{ (J/mol)} \times 35.1 \times 10^{-6} \text{ (mol)}}{0.1 \text{ (W/cm}^2\text{)} \times 1.0 \text{ (cm}^2\text{)} \times 3600 \text{ (s)}} \times 100\% = 1.14\%$$

For AQE measurements, 1.0 g of photocatalyst was dispersed in 200.0 mL H<sub>2</sub>O. A 150 W Xe-lamp with a band-pass filter of 420 nm was used as the incident light source. The irradiation area was controlled to be 1.0 cm<sup>2</sup>. The amount of H<sub>2</sub>O<sub>2</sub> production was analyzed after 1 h irradiation. AQE was calculated using the following equation:

$$\text{AQE\%} = 2 \times (N_{H_2O_2} N_A \cdot h \cdot c) / (I \cdot S \cdot t) \times 100\%$$

where N<sub>H<sub>2</sub>O<sub>2</sub></sub> was the amount of H<sub>2</sub>O<sub>2</sub> production (mol), N<sub>A</sub> was the Avogadro constant (6.022×10<sup>23</sup> mol<sup>-1</sup>), h was the Planck constant (6.626×10<sup>-34</sup> J·s), c was the

speed of light ( $3 \times 10^8 \text{ m} \cdot \text{s}^{-1}$ ),  $I$  was the irradiation intensity ( $\text{W} \cdot \text{cm}^{-2}$ ),  $S$  was the irradiation area ( $\text{cm}^2$ ),  $t$  was the irradiation time (s) and  $\lambda$  was the wavelength of incident light (nm).

### **Stability Test**

50 mg catalyst and 50 mL  $\text{H}_2\text{O}$  were added to the 300 mL reactor with continuous  $\text{O}_2$  bubbling at room temperature. The cycling photocatalytic test to investigate the photocatalytic stability was performed every 3 h as a cycle. The catalyst was recovered by centrifuging the sample.

### **Practical Application Test**

The tap water, lake water from Panchi Lake in Shanghai University, and real seawater from the East China Sea were used for photosynthesis of  $\text{H}_2\text{O}_2$  in ambient conditions. In detail, 5 mg catalyst and 50 mL solution were added to the 300 mL reactor and photothermal reactions were performed under continuous  $\text{O}_2$  bubbling or open air at room temperature.

### **Isotope labeling experiments.**

10 mL  $\text{H}_2\text{O}$  containing APF-GQDs (100 mg) was added into the closed glass tube. After vacuuming, the reactor was filled with Ar gas. Then  $^{18}\text{O}_2$  was injected and the reactor was irradiated with a 150 W xenon lamp (AM 1.5G) for 24 hours. After the reaction, the remaining  $^{18}\text{O}_2$  gas was removed by vacuuming the reactor. Then  $\text{MnO}_2$  aqueous solution (Ar saturation) was injected into the reactor to convert  $\text{H}_2\text{O}_2$  into  $\text{O}_2$ , and the gas products were analyzed by gas chromatography-mass spectrometry (GC-MS, MAT-271).

### **Rotating disk electrode (RDE) measurements**

The electrochemical ORR was measured on a CHI760E Electrochemical Workstation (CH Instruments) with a three-electrode configuration electrochemical cell. The graphite rod and Ag/AgCl electrode were chosen as the counter electrode and reference electrode, respectively. The rotating ring disk electrode with an electrode area of  $0.2475 \text{ cm}^2$  (RRDE, PINE Research Instrumentation) was used as the working electrode. The catalyst ink was prepared by mixing 3 mg of catalyst, 0.1 mL of DI water, 0.05 mL of 0.5% Nafion, and 1.80 mL of EtOH and ultra-sonicating for at least

30 min. Next, 10  $\mu\text{L}$  of the ink was dropped on the polished RRDE and dried at room temperature.

Before the ORR, the pre-activation process by scanning cycle voltammetry (CV) curves (20 cycles, scan rate: 50 mV/s) was performed on RRDE to electrochemically clean it until stable CV curves were obtained. The ORR polarization curves were assessed by linear sweep voltammograms (LSV) from 1.1 to 0.2 V (vs. RHE) with the sweep speed of 10 mV s<sup>-1</sup> at 1600 rpm in O<sub>2</sub>-saturated 0.1 M KOH (without iR correction), and Pt ring potential was maintained at 1.3 V (vs. RHE) to respond to the generated H<sub>2</sub>O<sub>2</sub>.

The H<sub>2</sub>O<sub>2</sub> selectivity and the transfer number electron (n) were calculated based on the disk current and ring current data as the following formulas:

$$\lambda(\text{H}_2\text{O}_2, \%) = 200 * \frac{I_{\text{ring}}/N}{I_{\text{disk}} + I_{\text{ring}}/N}$$

$$n = 4 * \frac{I_{\text{disk}}}{I_{\text{disk}} + I_{\text{ring}}/N}$$

#### **In-situ Synchrotron Radiation-based Fourier Transform Infrared Microscopy (SR-FTIR) Measurement Method.**

The measurements of SR-FTIR including infrared microspectroscopic analysis, were performed at the BL01B beamline of the National Facility for Protein Science in Shanghai (NFPS) at Shanghai Synchrotron Radiation Facility (SSRF). All spectra were acquired in transmission mode on a Nicolet 6700 FTIR spectrometer coupled with a Nicolet Continuum infrared microscope from ThermoFisher Scientific.

## Supplementary Figures

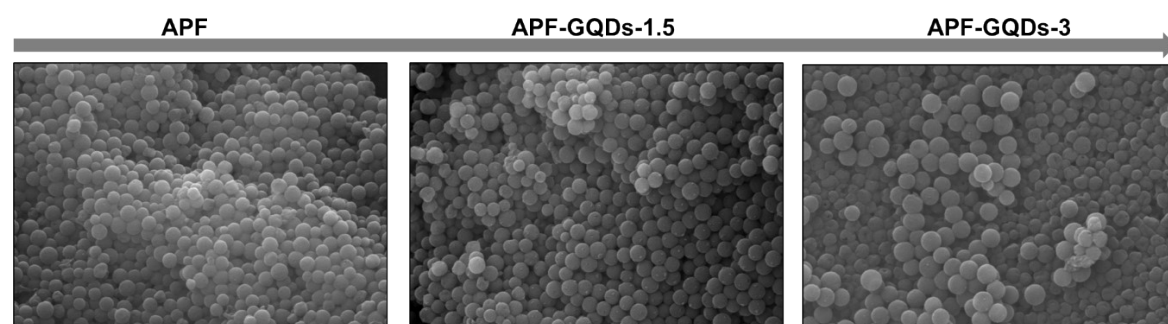

**Fig. S1** SEM images of APF-GQDs-x.

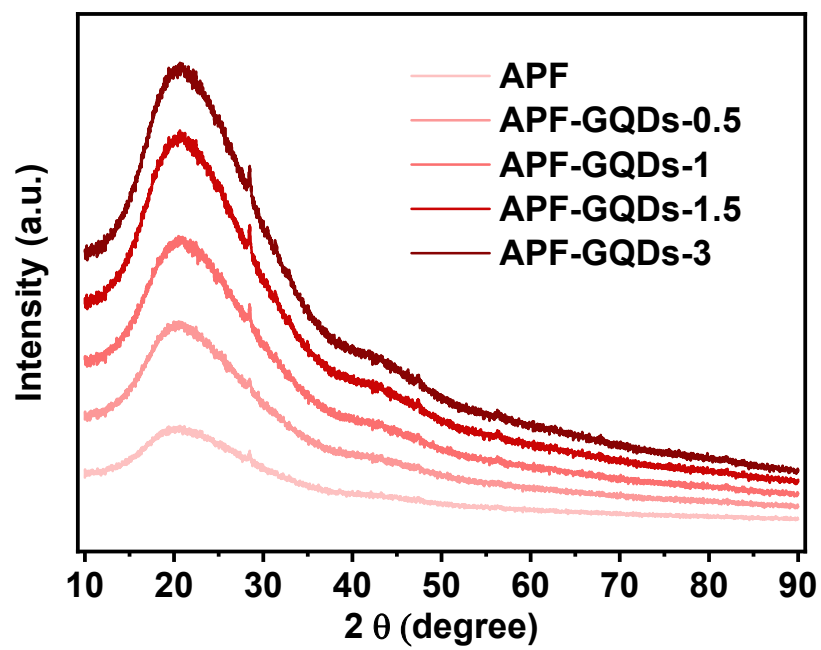

**Fig. S2** XRD patterns of APF and APF-GQDs-x.



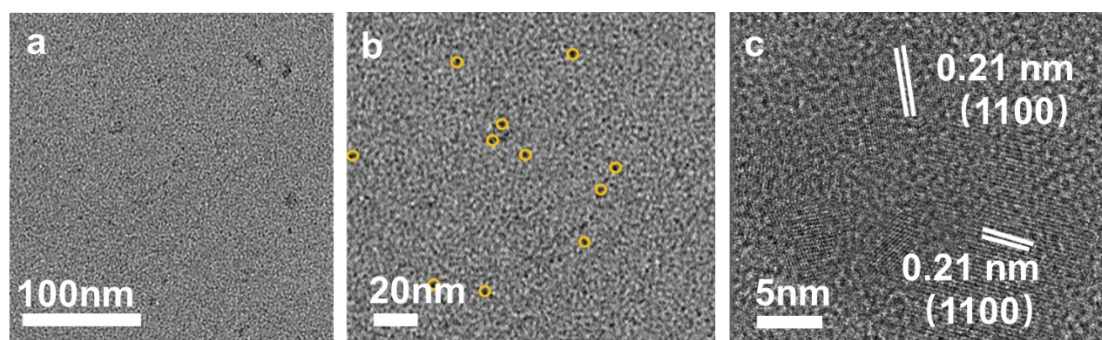

**Fig. S3** TEM and HRTEM images of GQDs

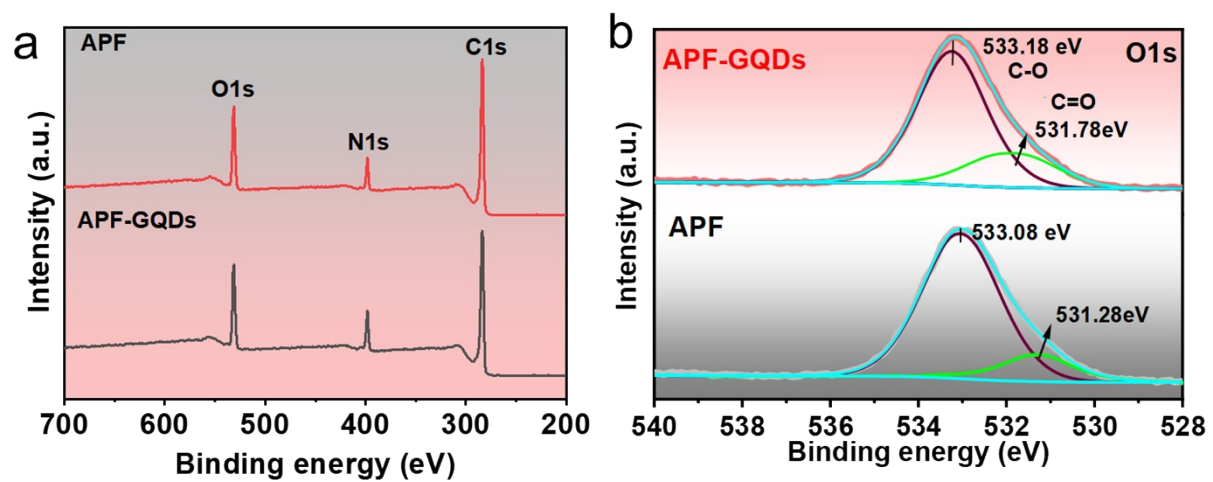

**Fig. S4** (a) XPS survey and (b) O1s high-resolution XPS spectra of APF and APF-GQDs.

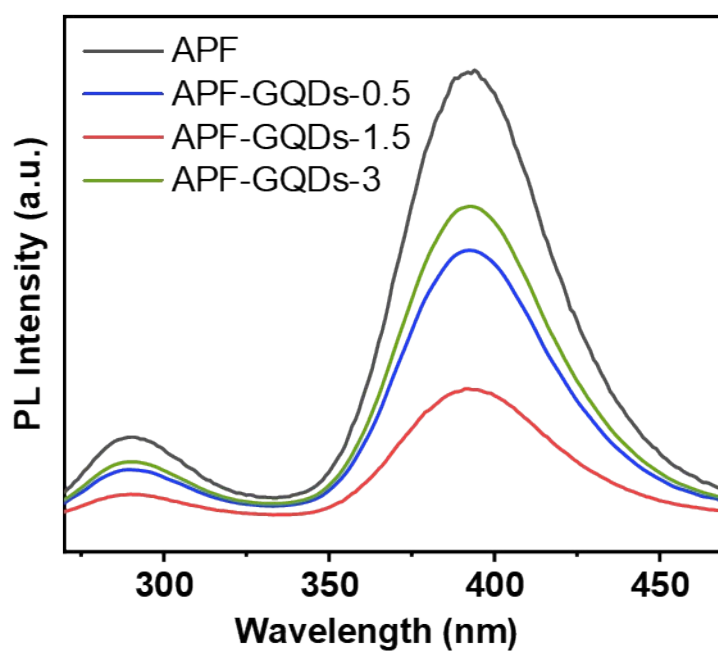

**Fig. S5** Photoluminescence spectroscopy of APF and APF-GQDs.

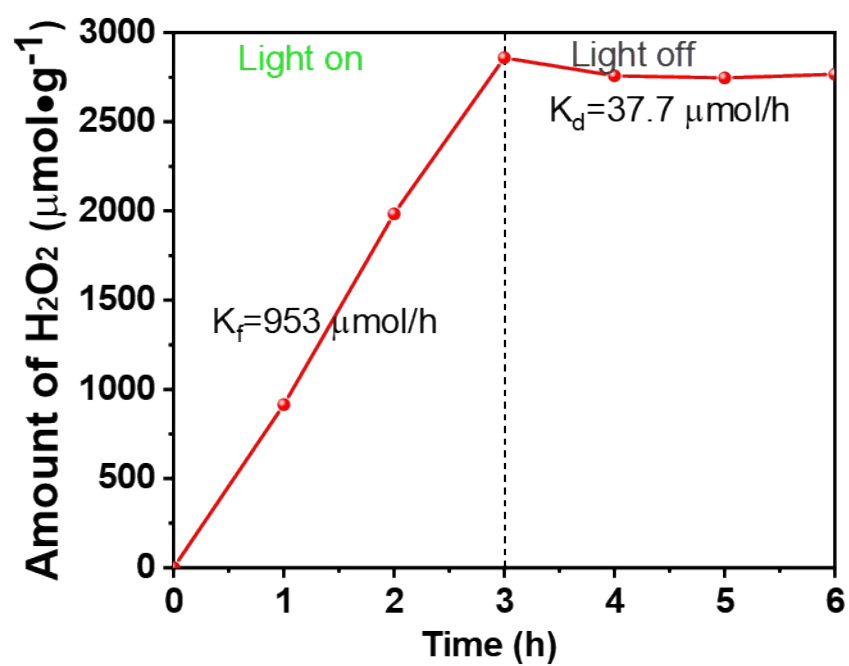

**Fig. S6** The variation of photocatalytic hydrogen peroxide production over time under light and dark conditions.

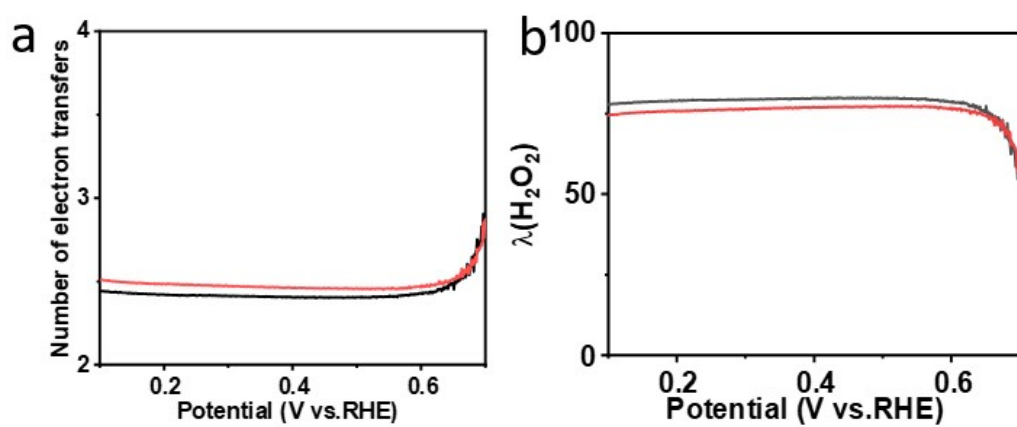

**Fig. S7** (a) Electron transfer number (n) and (b) H<sub>2</sub>O<sub>2</sub> selectivity of APF (black curve) and APF-GQD (red curve).

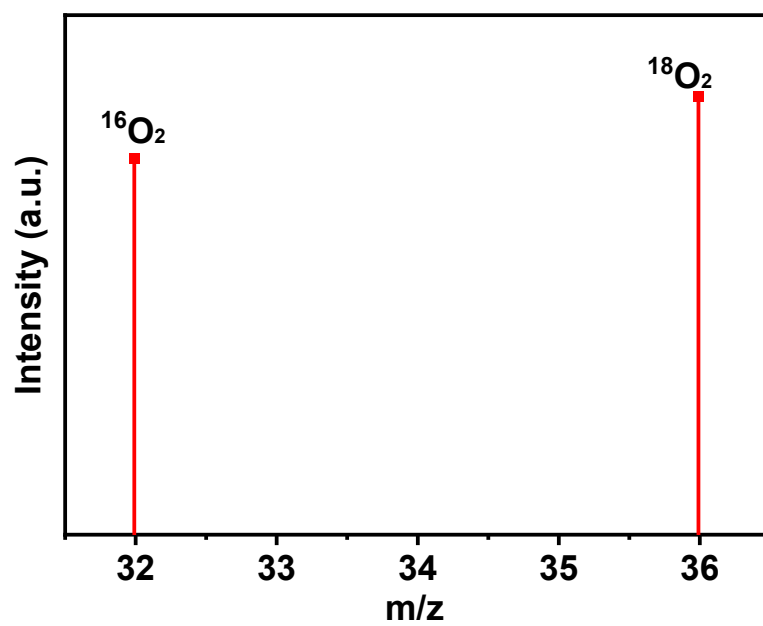

**Fig.S8** GC-MS charts for  $\text{O}_2$  evolved by decomposition of  $\text{H}_2\text{O}_2$  produced by isotopic photoreaction experiments.

**Table S1.** Elemental content of pristine APF and APF-GQD.

| Samples            | C(%)  | N(%)  | O(%)  |
|--------------------|-------|-------|-------|
| Pristine APF resin | 73.48 | 10.59 | 15.93 |
| APF-GQDS-1.5       | 74.54 | 11.46 | 14    |

**Table S2.** Summary of materials for photocatalytic H<sub>2</sub>O<sub>2</sub> generation activity.

| Catalyst                             | Atmosphere     | Light Source                                   | Amount of H <sub>2</sub> O <sub>2</sub><br>( $\mu\text{mol}\cdot\text{g}^{-1}\cdot\text{h}^{-1}$ ) | SCC<br>efficiency<br>(%) | Ref.         |
|--------------------------------------|----------------|------------------------------------------------|----------------------------------------------------------------------------------------------------|--------------------------|--------------|
| In <sub>2</sub> S <sub>3</sub> -CQDs | O <sub>2</sub> | 150W Xe lamp                                   | 634                                                                                                | 0.16                     | <sup>2</sup> |
| QAP2                                 | O <sub>2</sub> | 300W Xe lamp<br>( $\lambda\geq 420\text{nm}$ ) | 380                                                                                                | ---                      | <sup>3</sup> |
| CDs10MCN                             | O <sub>2</sub> | 300W Xe lamp<br>( $\lambda\geq 420\text{nm}$ ) | 423.17                                                                                             | ---                      | <sup>4</sup> |
| MRF                                  | O <sub>2</sub> | 300W Xe lamp<br>( $\lambda\geq 420\text{nm}$ ) | 575                                                                                                | 0.84                     | <sup>5</sup> |
| Resin                                | O <sub>2</sub> | 300W Xe lamp<br>( $\lambda\geq 420\text{nm}$ ) | 82                                                                                                 | 0.8                      | <sup>6</sup> |
| MPaCOFs/CQDs-2                       | O <sub>2</sub> | 300W Xe lamp<br>( $\lambda\geq 420\text{nm}$ ) | 540                                                                                                | 0.85                     | <sup>7</sup> |
| Nv-C $\equiv$ N-CN                   | O <sub>2</sub> | 300W Xe lamp<br>( $\lambda\geq 420\text{nm}$ ) | 323                                                                                                | 0.23                     | <sup>8</sup> |
| APF                                  | O <sub>2</sub> | 150W AM<br>1.5G solar<br>simulator             | 330.3                                                                                              | --                       | This<br>work |
| APF-GQDs-1.5                         | O <sub>2</sub> | 150W AM<br>1.5G solar<br>simulator             | 978                                                                                                | 1.14                     | This<br>work |

- 1 Z. Lu, G. Chen, S. Siahrostami, Z. Chen, K. Liu, J. Xie, L. Liao, T. Wu, D. Lin, Y. Liu, T. F. Jaramillo, J. K. Nørskov and Y. Cui, *Nat. Catal.* 2018, **1**, 156-162.
- 2 A. Tikoo, A. K. S. Koushik and P. Meduri, *ACS Appl. Eng. Mater.* 2023, **1**, 1397-1407.
- 3 B. Sheng, Y. Xie, Q. Zhao, H. Sheng and J. Zhao, *Energy Environ. Sci.* 2023.
- 4 H. Guo, L. Zhou, K. Huang, Y. Li, W. Hou, H. Liao, C. Lian, S. Yang, D. Wu, Z. Lei, Z. Liu and L. Wang, *Adv. Funct. Mater.* **50**, 2402650.
- 5 L. Yuan, C. Zhang, J. Wang, C. Liu and C. Yu, *Nano Res* 2021, **14**, 3267-3273.
- 6 Y. Shiraishi, T. Takii, T. Hagi, S. Mori, Y. Kofuji, Y. Kitagawa, S. Tanaka, S. Ichikawa and T. Hirai, *Nat. Mater.* 2019, **18**, 985-993.
- 7 Y. Zhao, Y. Liu, J. Cao, H. Wang, M. Shao, H. Huang, Y. Liu and Z. Kang, *Appl. Catal. B: Environ.* 2020, **278**, 119289.
- 8 X. Zhang, P. Ma, C. Wang, L. Gan, X. Chen, P. Zhang, Y. Wang, H. Li, L. Wang, X. Zhou and K. Zheng, *Energy Environ. Sci.* 2022, **15**, 830-842.
